# Supplementary material
Source: publisher figshare collection journal article supplement (https://rs.figshare.com/ndownloader/files/8934199)

## Supplementary Materials

**Figure S1. Daily mean (gray), maximum (red), and minimum (blue) operative temperatures over the course of the reproductive season compared between open (solid) and shaded (dashed) microhabitats.**

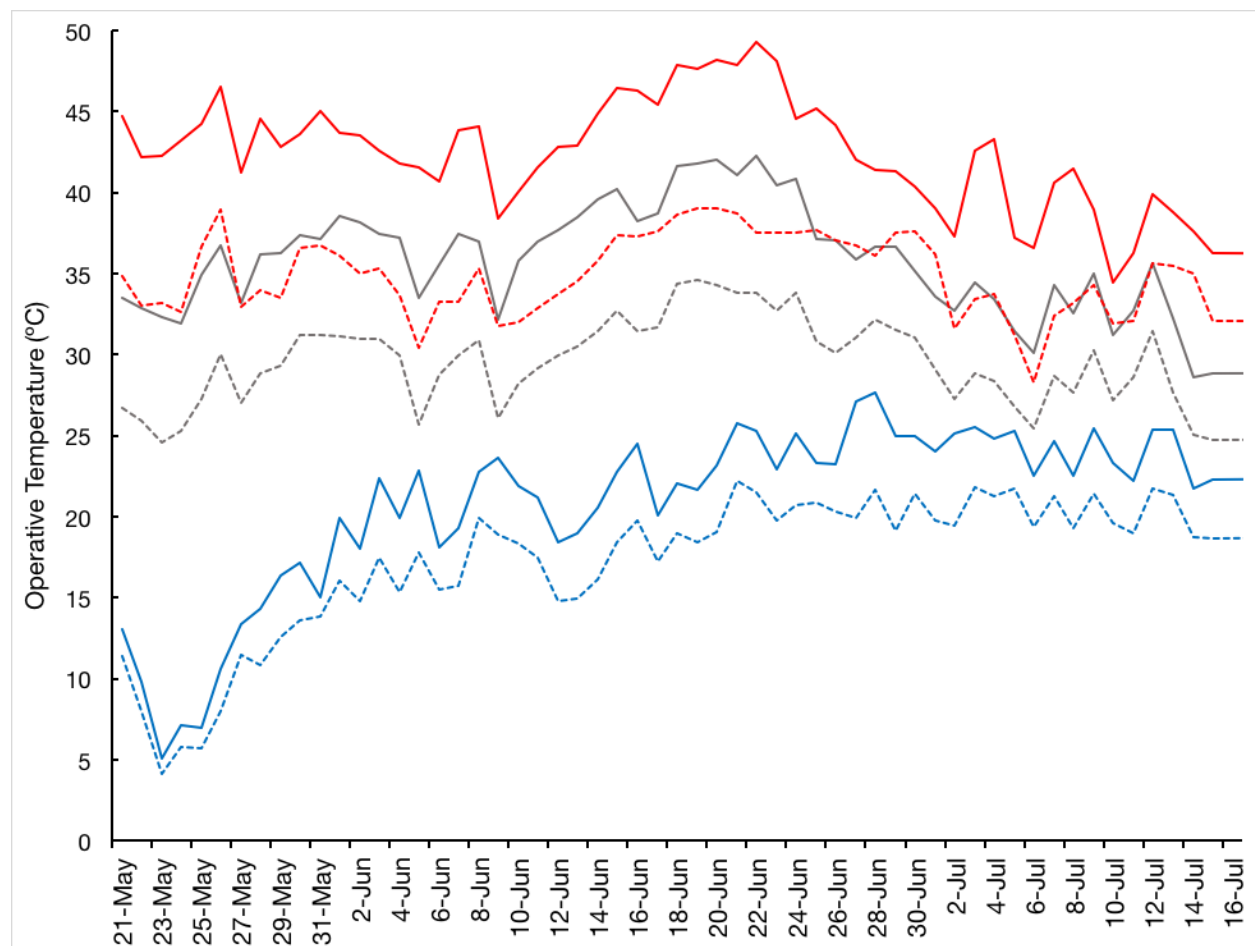

**Figure S2. Frequency distribution of field-active body temperatures for all individuals (N=206) included in our analysis.**

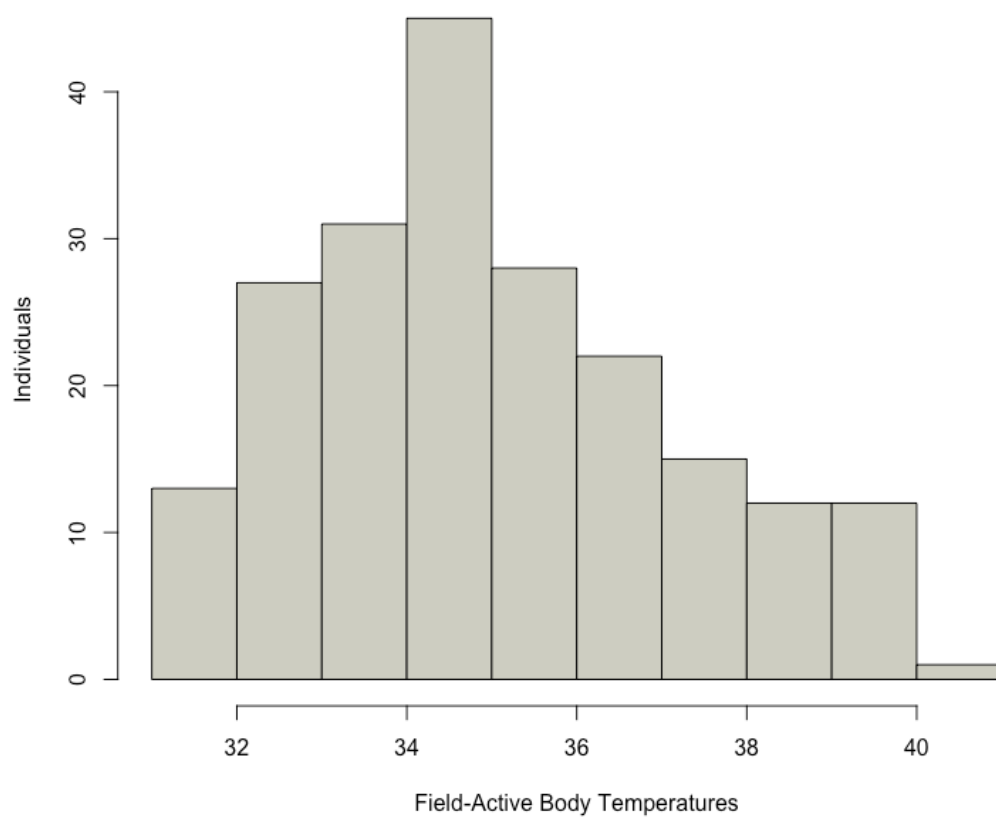

Supplement: Supplementary file 1 [file 8934199]
